# Supplementary material for: Comparative Effectiveness of Robot-Assisted vs. Open Prostatectomy: a Real-Life Nationwide Study
Source: Research Square preprint supplement (doi:10.21203/rs.3.rs-6459669/v1), 2025-05-08
Supplement: Supplementary file 1 [file e6b8a0646e44e1e4b09c5fd2.docx]

**Comparative Effectiveness of Robot-Assisted Prostatectomy versus Open Surgery**

**SUPPLEMENTARY MATERIAL**

## Supplementary Table 1.

## Supplementary Table 2.

## Supplementary Table 3.

## Supplementary Table 4.

## Supplementary Figure 1.

**Supplementary table 1. List of variables used for hdPS estimation**

|  | **Overall cohort** | |  | **Matched cohort** | |
| --- | --- | --- | --- | --- | --- |
|  | **RARP n = 10040** | **ORP n = 17911** |  | **RARP n = 5677** | **ORP n = 5677** |
| **FIXED VARIABLES** |  |  |  |  |  |
|  |  |  |  |  |  |
| **Age at index surgery (years)** |  |  |  |  |  |
| Size (missing) | 10040  (0) | 17911  (0) |  | 5677  (0) | 5677  (0) |
| Mean (± SD) | 64.1  (6.1) | 64.5  (6.0) |  | 64.2  (5.8) | 64.2  (5.8) |
| Median | 65.0 | 65.0 |  | 65.0 | 65.0 |
| [p25% - p75%] | [60.0;68.0] | [61.0;69.0] |  | [60.0;68.0] | [60.0;68.0] |
| [Min - Max] | [41.0;91.0] | [39.0;86.0] |  | [46.0;81.0] | [46.0;81.0] |
|  |  |  |  |  |  |
| **Area of residence, n (%)** |  |  |  |  |  |
| South-east | 2935    (29.2) | 3779    (21.1) |  | 1512    (26.6) | 1570    (27.7) |
| South-west | 2395    (23.9) | 2284    (12.8) |  | 1227    (21.6) | 1227    (21.6) |
| Paris area | 1739    (17.3) | 1918    (10.7) |  | 790    (13.9) | 799    (14.1) |
| North-east | 1428    (14.2) | 5379    (30.0) |  | 1090    (19.2) | 1082    (19.1) |
| North-west | 1430    (14.2) | 4109    (22.9) |  | 974    (17.2) | 919    (16.2) |
| Overseas collectivity | 113      (1.1) | 442      (2.5) |  | 84      (1.5) | 80      (1.4) |
|  |  |  |  |  |  |
| **Social deprivation index, n (%)** |  |  |  |  |  |
| Quintile n°1 | 2983    (29.7) | 2526    (14.1) |  | 1250    (22.0) | 1290    (22.7) |
| Quintile n°2 | 2230    (22.2) | 3411    (19.0) |  | 1280    (22.5) | 1293    (22.8) |
| Quintile n°3 | 1846    (18.4) | 3720    (20.8) |  | 1129    (19.9) | 1114    (19.6) |
| Quintile n°4 | 1521    (15.1) | 3705    (20.7) |  | 1014    (17.9) | 989    (17.4) |
| Quintile n°5 | 1139    (11.3) | 3721    (20.8) |  | 797    (14.0) | 791    (13.9) |
| Quintile missing | 321      (3.2) | 828      (4.6) |  | 207      (3.6) | 200      (3.5) |
|  |  |  |  |  |  |
| **Year of index surgery, n (%)** |  |  |  |  |  |
| 2012 | 2071    (20.6) | 4816    (26.9) |  | 1277    (22.5) | 1277    (22.5) |
| 2013 | 2110    (21.0) | 4398    (24.6) |  | 1281    (22.6) | 1281    (22.6) |
| 2014 | 2481    (24.7) | 4276    (23.9) |  | 1393    (24.5) | 1393    (24.5) |
| 2015 | 3378    (33.6) | 4421    (24.7) |  | 1726    (30.4) | 1726    (30.4) |
|  |  |  |  |  |  |
| **Outpatient costs (euros) per patient in the year before index surgery (last month excluded)** |  |  |  |  |  |
| Size (missing) | 10040  (0) | 17911  (0) |  | 5677  (0) | 5677  (0) |
| Mean (± SD) | 2451.0  (2343.5) | 2318.9  (1945.1) |  | 2352.8  (2029.1) | 2376.8  (2070.9) |
| Median | 1968.5 | 1898.5 |  | 1951.0 | 1934.9 |
| [p25% - p75%] | [1317.9;2892.6] | [1313.5;2758.2] |  | [1312.0;2843.6] | [1316.4;2815.9] |
| [Min - Max] | [0.0;58023.9] | [0.0;48992.0] |  | [0.0;58023.9] | [14.8;38924.4] |
|  |  |  |  |  |  |
| **Outpatient costs (euros) per patient in the month before index surgery** |  |  |  |  |  |
| Size (missing) | 10040  (0) | 17911  (0) |  | 5677  (0) | 5677  (0) |
| Mean (± SD) | 389.7  (399.0) | 412.5  (345.5) |  | 395.6  (410.5) | 392.6  (344.8) |
| Median | 289.0 | 326.8 |  | 297.5 | 305.0 |
| [p25% - p75%] | [165.4;488.7] | [196.1;532.2] |  | [171.9;487.5] | [177.2;498.9] |
| [Min - Max] | [0.0;9282.2] | [0.0;6783.6] |  | [0.0;9282.2] | [0.0;5805.0] |
|  |  |  |  |  |  |
| **Inpatient costs (euros) per patient in the year before index surgery (last month excluded)** |  |  |  |  |  |
| Size (missing) | 10040  (0) | 17911  (0) |  | 5677  (0) | 5677  (0) |
| Mean (± SD) | 1494.0  (5377.9) | 1270.9  (3250.2) |  | 1255.5  (4770.8) | 1274.6  (2916.9) |
| Median | 653.0 | 588.2 |  | 627.3 | 599.6 |
| [p25% - p75%] | [314.1;1313.7] | [99.2;1167.4] |  | [251.8;1196.5] | [189.1;1227.7] |
| [Min - Max] | [0.0;300736.5] | [0.0;105719.1] |  | [0.0;300736.5] | [0.0;76255.7] |
|  |  |  |  |  |  |
| **Inpatient costs (euros) per patient in the month before index surgery** |  |  |  |  |  |
| Size (missing) | 10040  (0) | 17911  (0) |  | 5677  (0) | 5677  (0) |
| Mean (± SD) | 135.0  (630.0) | 95.1  (422.1) |  | 108.6  (342.4) | 107.1  (438.2) |
| Median | 26.0 | 0.0 |  | 26.0 | 0.0 |
| [p25% - p75%] | [0.0;105.1] | [0.0;52.0] |  | [0.0;95.3] | [0.0;72.0] |
| [Min - Max] | [0.0;45955.0] | [0.0;16414.8] |  | [0.0;6294.8] | [0.0;16414.8] |
|  |  |  |  |  |  |
|  |  |  |  |  |  |
|  |  |  |  |  |  |
| **EMPIRICAL VARIABLES** |  |  |  |  |  |
|  |  |  |  |  |  |
| **≥ 1 hospitalization with following diagnosis ICD-10 code (2 years before index surgery), n (%)** |  |  |  |  |  |
| C61 - Malignant neoplasm of prostate | 8981    (89.5) | 16387    (91.5) |  | 5142    (90.6) | 5171    (91.1) |
| I10 - Essential (primary) hypertension | 1201    (12.0) | 2424    (13.5) |  | 671    (11.8) | 697    (12.3) |
| E11 - Non-insulin-dependent diabetes mellitus | 893      (8.9) | 1744      (9.7) |  | 525      (9.2) | 494      (8.7) |
| E78 - Disorders of lipoprotein metabolism and other lipidaemias | 508      (5.1) | 999      (5.6) |  | 295      (5.2) | 315      (5.5) |
| K57 - Diverticular disease of intestine | 389      (3.9) | 774      (4.3) |  | 228      (4.0) | 230      (4.1) |
| T81 - Complications of procedures, not elsewhere classified | 246      (2.5) | 381      (2.1) |  | 113      (2.0) | 114      (2.0) |
| E66 - Obesity | 239      (2.4) | 470      (2.6) |  | 134      (2.4) | 132      (2.3) |
| N41 - Inflammatory diseases of prostate | 235      (2.3) | 375      (2.1) |  | 130      (2.3) | 118      (2.1) |
| I70 - Atherosclerosis | 196      (2.0) | 404      (2.3) |  | 109      (1.9) | 102      (1.8) |
| Z50 - Care involving use of rehabilitation procedures | 191      (1.9) | 290      (1.6) |  | 89      (1.6) | 98      (1.7) |
| B96 - Other specified bacterial agents as the cause of diseases classified to other chapters | 191      (1.9) | 279      (1.6) |  | 99      (1.7) | 94      (1.7) |
| F17 - Mental and behavioral disorders due to use of tobacco | 156      (1.6) | 346      (1.9) |  | 92      (1.6) | 90      (1.6) |
| I25 - Chronic ischemic heart disease | 154      (1.5) | 234      (1.3) |  | 75      (1.3) | 83      (1.5) |
| Z48 - Other surgical follow-up care | 140      (1.4) | 309      (1.7) |  | 74      (1.3) | 59      (1.0) |
| Z51 - Other medical care | 119      (1.2) | 201      (1.1) |  | 58      (1.0) | 56      (1.0) |
| C67 - Malignant neoplasm of bladder | 122      (1.2) | 239      (1.3) |  | 64      (1.1) | 71      (1.3) |
| N18 - Chronic kidney disease | 115      (1.1) | 146      (0.8) |  | 45      (0.8) | 41      (0.7) |
| R31 - Unspecified hematuria | 96      (1.0) | 140      (0.8) |  | 46      (0.8) | 47      (0.8) |
| F10 - Mental and behavioral disorders due to use of alcohol | 81      (0.8) | 187      (1.0) |  | 36      (0.6) | 43      (0.8) |
| I50 - Heart failure | 80      (0.8) | 161      (0.9) |  | 43      (0.8) | 42      (0.7) |
| M23 - Internal derangement of knee | 77      (0.8) | 96      (0.5) |  | 38      (0.7) | 37      (0.7) |
| Z99 - Dependence on enabling machines and devices, not elsewhere classified | 76      (0.8) | 76      (0.4) |  | 30      (0.5) | 35      (0.6) |
| R77 - Other abnormalities of plasma proteins | 76      (0.8) | 92      (0.5) |  | 38      (0.7) | 38      (0.7) |
| J44 - Other chronic obstructive pulmonary disease | 72      (0.7) | 170      (0.9) |  | 42      (0.7) | 41      (0.7) |
| G56 - Mononeuropathies of upper limb | 70      (0.7) | 98      (0.5) |  | 40      (0.7) | 40      (0.7) |
| D40 - Neoplasm of uncertain or unknown behavior of male genital organs | 65      (0.6) | 59      (0.3) |  | 25      (0.4) | 25      (0.4) |
| Z94 - Transplanted organ and tissue status | 62      (0.6) | 32      (0.2) |  | 19      (0.3) | 15      (0.3) |
| M17 - Gonarthrosis [arthrosis of knee] | 57      (0.6) | 125      (0.7) |  | 32      (0.6) | 32      (0.6) |
| J96 - Respiratory failure, not elsewhere classified | 54      (0.5) | 144      (0.8) |  | 29      (0.5) | 22      (0.4) |
| I35 - Nonrheumatic aortic valve disorders | 48      (0.5) | 101      (0.6) |  | 25      (0.4) | 30      (0.5) |
| N35 - Urethral stricture | 48      (0.5) | 54      (0.3) |  | 22      (0.4) | 20      (0.4) |
| H25 - Senile cataract | 47      (0.5) | 102      (0.6) |  | 30      (0.5) | 25      (0.4) |
| Z49 - Care involving dialysis | 40      (0.4) | 34      (0.2) |  | 9      (0.2) | 12      (0.2) |
| E55 - Vitamin D deficiency | 40      (0.4) | 41      (0.2) |  | 10      (0.2) | 13      (0.2) |
| Z12 - Special screening examination for neoplasms | 36      (0.4) | 211      (1.2) |  | 25      (0.4) | 25      (0.4) |
| E03 - Other hypothyroidism | 35      (0.3) | 49      (0.3) |  | 18      (0.3) | 9      (0.2) |
| K58 - Irritable bowel syndrome | 35      (0.3) | 94      (0.5) |  | 25      (0.4) | 27      (0.5) |
| N32 - Other disorders of bladder | 31      (0.3) | 72      (0.4) |  | 19      (0.3) | 15      (0.3) |
| M20 - Acquired deformities of fingers and toes | 16      (0.2) | 42      (0.2) |  | 9      (0.2) | 12      (0.2) |
| I11 - Hypertensive heart disease | 15      (0.1) | 60      (0.3) |  | 11      (0.2) | 9      (0.2) |
| Z29 - Need for other prophylactic measures | 15      (0.1) | 11      (0.1) |  | 6      (0.1) | 6      (0.1) |
| K70 - Alcoholic liver disease | 14      (0.1) | 38      (0.2) |  | 6      (0.1) | 11      (0.2) |
| R26 - Abnormalities of gait and mobility | 9      (0.1) | 6      (0.0) |  | 2      (0.0) | 1      (0.0) |
|  |  |  |  |  |  |
|  |  |  |  |  |  |
| **≥ 1 visit with the following specialty (1 year before index surgery), n (%)** |  |  |  |  |  |
| Urological surgery | 9162    (91.3) | 15418    (86.1) |  | 5112    (90.0) | 5086    (89.6) |
| General practitioner | 7961    (79.3) | 14656    (81.8) |  | 4574    (80.6) | 4569    (80.5) |
| Nurse | 6587    (65.6) | 12240    (68.3) |  | 3733    (65.8) | 3729    (65.7) |
| Physiotherapist | 4294    (42.8) | 7022    (39.2) |  | 2390    (42.1) | 2417    (42.6) |
| Cardiovascular diseases | 3250    (32.4) | 7021    (39.2) |  | 1943    (34.2) | 1892    (33.3) |
| Unknown specialty | 2161    (21.5) | 2340    (13.1) |  | 979    (17.2) | 1006    (17.7) |
| General surgery | 1908    (19.0) | 3792    (21.2) |  | 1081    (19.0) | 1110    (19.6) |
| General practitioner (unknown specialty) | 1749    (17.4) | 2966    (16.6) |  | 960    (16.9) | 954    (16.8) |
| Dental surgery | 1773    (17.7) | 2776    (15.5) |  | 955    (16.8) | 978    (17.2) |
| Dermatology and Venereology | 1586    (15.8) | 2202    (12.3) |  | 790    (13.9) | 807    (14.2) |
| Gastroenterology and Hepatology | 1058    (10.5) | 1668      (9.3) |  | 564      (9.9) | 580    (10.2) |
| Radiotherapy Oncology | 686      (6.8) | 456      (2.5) |  | 245      (4.3) | 245      (4.3) |
| Otorhinolaryngology | 629      (6.3) | 1019      (5.7) |  | 334      (5.9) | 357      (6.3) |
| Medical laboratory | 810      (8.1) | 1170      (6.5) |  | 436      (7.7) | 434      (7.6) |
| Rheumatology | 620      (6.2) | 852      (4.8) |  | 303      (5.3) | 309      (5.4) |
| Orthoptist | 315      (3.1) | 427      (2.4) |  | 154      (2.7) | 145      (2.6) |
| General Psychiatry | 279      (2.8) | 324      (1.8) |  | 134      (2.4) | 120      (2.1) |
| Medical Oncology | 228      (2.3) | 192      (1.1) |  | 82      (1.4) | 83      (1.5) |
| Physical and Rehabilitation medicine | 196      (2.0) | 166      (0.9) |  | 75      (1.3) | 77      (1.4) |
| Unknown specialty | 178      (1.8) | 191      (1.1) |  | 88      (1.6) | 87      (1.5) |
| Internal medicine | 160      (1.6) | 191      (1.1) |  | 69      (1.2) | 76      (1.3) |
| Neuropsychiatry | 150      (1.5) | 80      (0.4) |  | 55      (1.0) | 44      (0.8) |
| Maxillofacial surgery and Stomatology | 138      (1.4) | 202      (1.1) |  | 73      (1.3) | 81      (1.4) |
| Radiotherapy | 98      (1.0) | 132      (0.7) |  | 63      (1.1) | 55      (1.0) |
| Hematology | 96      (1.0) | 124      (0.7) |  | 53      (0.9) | 46      (0.8) |
| Radio diagnostic and Medical imagery | 85      (0.8) | 88      (0.5) |  | 40      (0.7) | 29      (0.5) |
| Nephrology | 77      (0.8) | 70      (0.4) |  | 26      (0.5) | 23      (0.4) |
| Vascular surgery | 72      (0.7) | 101      (0.6) |  | 29      (0.5) | 29      (0.5) |
| Esthetic and Reconstructive Plastic surgery | 71      (0.7) | 71      (0.4) |  | 29      (0.5) | 34      (0.6) |
| Speech therapist | 38      (0.4) | 53      (0.3) |  | 19      (0.3) | 20      (0.4) |
|  |  |  |  |  |  |
|  |  |  |  |  |  |
| **≥ 1 of the following lab test (1 year before index surgery), n (%)** |  |  |  |  |  |
| Glucose | 7612    (75.8) | 13846    (77.3) |  | 4306    (75.8) | 4295    (75.7) |
| Exploration of Lipid Anomalies | 7398    (73.7) | 13546    (75.6) |  | 4197    (73.9) | 4210    (74.2) |
| Creatinine | 7008    (69.8) | 13020    (72.7) |  | 3983    (70.2) | 3999    (70.4) |
| Urine Cytobacteriological Examination (CBEU) | 7007    (69.8) | 12030    (67.2) |  | 3838    (67.6) | 3850    (67.8) |
| Prostate-Specific Antigen (PSA) Test | 6611    (65.8) | 13121    (73.3) |  | 3929    (69.2) | 3938    (69.4) |
| Free Prostate-Specific Antigen (Free PSA) with Ratio | 6371    (63.5) | 10035    (56.0) |  | 3451    (60.8) | 3476    (61.2) |
| Gamma-Glutamyl Transferase (GGT) | 5295    (52.7) | 9163    (51.2) |  | 2983    (52.5) | 2974    (52.4) |
| Erythrocyte Sedimentation Rate (ESR) | 4912    (48.9) | 8959    (50.0) |  | 2793    (49.2) | 2808    (49.5) |
| Urea and Creatinine | 4130    (41.1) | 6583    (36.8) |  | 2194    (38.6) | 2166    (38.2) |
| C-Reactive Protein (CRP) | 4356    (43.4) | 7528    (42.0) |  | 2432    (42.8) | 2427    (42.8) |
| Complete Blood Count (CBC) Including Platelets | 3946    (39.3) | 6695    (37.4) |  | 2095    (36.9) | 2042    (36.0) |
| Calcium | 2967    (29.6) | 4140    (23.1) |  | 1514    (26.7) | 1477    (26.0) |
| Alkaline Phosphatase | 2379    (23.7) | 3784    (21.1) |  | 1280    (22.5) | 1247    (22.0) |
| HbA1c Test | 2477    (24.7) | 4334    (24.2) |  | 1379    (24.3) | 1342    (23.6) |
| Transaminases (ALT, AST, TGP, TGO) | 2049    (20.4) | 3480    (19.4) |  | 1090    (19.2) | 1068    (18.8) |
| Ferritin | 1997    (19.9) | 3237    (18.1) |  | 1088    (19.2) | 1089    (19.2) |
| Blood Electrolyte Panel (Sodium, Potassium, Chloride) | 1895    (18.9) | 3234    (18.1) |  | 1036    (18.2) | 1005    (17.7) |
| Functional Fibrinogen Assay (Factor I) | 1835    (18.3) | 1983    (11.1) |  | 851    (15.0) | 823    (14.5) |
| 25-(OH)-Vitamin D (D2 + D3) Measurement | 1447    (14.4) | 2200    (12.3) |  | 759    (13.4) | 734    (12.9) |
| Bilirubin | 1350    (13.4) | 1863    (10.4) |  | 673    (11.9) | 667    (11.7) |
| Comprehensive Electrolyte Panel | 1242    (12.4) | 1630      (9.1) |  | 587    (10.3) | 560      (9.9) |
| Irregular Antibody Screening (RAI) | 1240    (12.4) | 2902    (16.2) |  | 730    (12.9) | 714    (12.6) |
| Blood Grouping (ABO and Rh) | 1195    (11.9) | 2642    (14.8) |  | 703    (12.4) | 678    (11.9) |
| Total Serum or Plasma Proteins | 1190    (11.9) | 2018    (11.3) |  | 678    (11.9) | 637    (11.2) |
| Rh Phenotyping (C, c, E, e) and Kell Antigen (K) | 1185    (11.8) | 2612    (14.6) |  | 695    (12.2) | 668    (11.8) |
| Hepatitis C (Anti-HCV Antibodies) | 1164    (11.6) | 2411    (13.5) |  | 532      (9.4) | 490      (8.6) |
| Hepatitis B (Total Anti-HBc Antibodies) | 1004    (10.0) | 1349      (7.5) |  | 430      (7.6) | 392      (6.9) |
| Prothrombin Time (INR) in Antivitamin K Therapy | 931      (9.3) | 1607      (9.0) |  | 504      (8.9) | 469      (8.3) |
| Testosterone (in men) | 888      (8.8) | 282      (1.6) |  | 152      (2.7) | 141      (2.5) |
| Inorganic Phosphate (Phosphatemia) | 803      (8.0) | 1030      (5.8) |  | 375      (6.6) | 347      (6.1) |
| Basic Hemostasis Testing | 765      (7.6) | 1177      (6.6) |  | 425      (7.5) | 467      (8.2) |
| Isolated Platelet Count | 762      (7.6) | 1699      (9.5) |  | 475      (8.4) | 436      (7.7) |
| Urine Protein Quantification | 761      (7.6) | 1495      (8.3) |  | 410      (7.2) | 409      (7.2) |
| Bicarbonates or Total CO2 | 674      (6.7) | 984      (5.5) |  | 378      (6.7) | 390      (6.9) |
| Free or Bioavailable Testosterone | 655      (6.5) | 194      (1.1) |  | 95      (1.7) | 96      (1.7) |
| Protein Electrophoresis | 644      (6.4) | 1035      (5.8) |  | 336      (5.9) | 342      (6.0) |
| Microalbuminuria (Immunochemical Dosage) | 608      (6.1) | 957      (5.3) |  | 329      (5.8) | 313      (5.5) |
| Potassium | 572      (5.7) | 1279      (7.1) |  | 349      (6.1) | 348      (6.1) |
| Lipasemia | 572      (5.7) | 894      (5.0) |  | 287      (5.1) | 285      (5.0) |
| Urine Creatinine | 525      (5.2) | 656      (3.7) |  | 265      (4.7) | 234      (4.1) |
| Lactate Dehydrogenase (LDH) | 482      (4.8) | 656      (3.7) |  | 225      (4.0) | 234      (4.1) |
| Albumin | 462      (4.6) | 931      (5.2) |  | 245      (4.3) | 245      (4.3) |
| TSH + Free T4 (Second-line Thyroid Function Test) | 424      (4.2) | 637      (3.6) |  | 231      (4.1) | 229      (4.0) |
| Natriuretic Peptides (ANP, BNP, NT-proBNP) | 421      (4.2) | 708      (4.0) |  | 219      (3.9) | 208      (3.7) |
| Troponin (Quantitative) | 396      (3.9) | 664      (3.7) |  | 187      (3.3) | 192      (3.4) |
| Triglycerides | 385      (3.8) | 619      (3.5) |  | 214      (3.8) | 208      (3.7) |
| Total Cholesterol | 345      (3.4) | 547      (3.1) |  | 187      (3.3) | 184      (3.2) |
| Syphilis Serology | 305      (3.0) | 144      (0.8) |  | 66      (1.2) | 64      (1.1) |
| TSH + Free T3 + Free T4 | 251      (2.5) | 322      (1.8) |  | 121      (2.1) | 113      (2.0) |
| Histopathology (Complex Specimen) | 202      (2.0) | 139      (0.8) |  | 89      (1.6) | 77      (1.4) |
| Alanine Aminotransferase (ALT) | 181      (1.8) | 494      (2.8) |  | 101      (1.8) | 96      (1.7) |
| Apolipoprotein A1 Test for Genetic Conditions | 149      (1.5) | 315      (1.8) |  | 82      (1.4) | 84      (1.5) |
| Urine Potassium and Sodium | 147      (1.5) | 169      (0.9) |  | 61      (1.1) | 56      (1.0) |
| Protein Electrophoresis with Typing | 144      (1.4) | 190      (1.1) |  | 81      (1.4) | 70      (1.2) |
| Temporary Additional Grading | 144      (1.4) | 86      (0.5) |  | 53      (0.9) | 48      (0.8) |
| Reticulocyte Count | 136      (1.4) | 273      (1.5) |  | 69      (1.2) | 66      (1.2) |
| Urine pH (Electrometric) | 125      (1.2) | 120      (0.7) |  | 56      (1.0) | 55      (1.0) |
| Anti-Thyroperoxidase Autoantibodies | 123      (1.2) | 128      (0.7) |  | 47      (0.8) | 54      (1.0) |
| Transferrin | 113      (1.1) | 110      (0.6) |  | 52      (0.9) | 53      (0.9) |
| Anti-Thyroglobulin Autoantibodies | 118      (1.2) | 120      (0.7) |  | 48      (0.8) | 52      (0.9) |
| Urine Glucose Quantification | 111      (1.1) | 323      (1.8) |  | 70      (1.2) | 73      (1.3) |
| Urine Calcium | 101      (1.0) | 105      (0.6) |  | 34      (0.6) | 39      (0.7) |
| Hepatitis A (IgM) | 100      (1.0) | 54      (0.3) |  | 22      (0.4) | 23      (0.4) |
| Lyme Disease Serology | 94      (0.9) | 201      (1.1) |  | 59      (1.0) | 55      (1.0) |
| Procalcitonin Measurement | 88      (0.9) | 112      (0.6) |  | 42      (0.7) | 48      (0.8) |
| Urine Sediment Analysis | 67      (0.7) | 72      (0.4) |  | 27      (0.5) | 32      (0.6) |
| Urine Phosphate | 60      (0.6) | 55      (0.3) |  | 22      (0.4) | 19      (0.3) |
| Luteinizing Hormone (LH) | 58      (0.6) | 44      (0.2) |  | 23      (0.4) | 17      (0.3) |
| Recent CMV Infection (IgG + IgM) | 52      (0.5) | 61      (0.3) |  | 16      (0.3) | 20      (0.4) |
| Microbial Culture in Blood | 51      (0.5) | 64      (0.4) |  | 22      (0.4) | 25      (0.4) |
| EBV Infection (IgG and EBNA Antibodies) | 51      (0.5) | 52      (0.3) |  | 15      (0.3) | 21      (0.4) |
| Beta-2 Microglobulin | 49      (0.5) | 67      (0.4) |  | 19      (0.3) | 24      (0.4) |
| Lactic Acid | 48      (0.5) | 150      (0.8) |  | 39      (0.7) | 30      (0.5) |
| HTLV (I and II) Screening | 47      (0.5) | 53      (0.3) |  | 8      (0.1) | 9      (0.2) |
| Follicle-Stimulating Hormone (FSH) | 45      (0.4) | 37      (0.2) |  | 20      (0.4) | 14      (0.2) |
| Urine Bence Jones Protein | 43      (0.4) | 41      (0.2) |  | 20      (0.4) | 17      (0.3) |
| Anti-Factor Xa Activity (Heparin) | 46      (0.5) | 33      (0.2) |  | 20      (0.4) | 13      (0.2) |
| D-Dimer Test | 42      (0.4) | 114      (0.6) |  | 22      (0.4) | 24      (0.4) |
| Immunohistochemistry on Paraffin Sections | 40      (0.4) | 41      (0.2) |  | 15      (0.3) | 17      (0.3) |
| Haptoglobin | 35      (0.3) | 42      (0.2) |  | 14      (0.2) | 18      (0.3) |
| Hydroxylated Vitamin D Derivatives | 31      (0.3) | 39      (0.2) |  | 13      (0.2) | 14      (0.2) |
| Prealbumin | 24      (0.2) | 18      (0.1) |  | 6      (0.1) | 7      (0.1) |
| Monitoring Known Hematologic Malignancies | 20      (0.2) | 24      (0.1) |  | 5      (0.1) | 8      (0.1) |
|  |  |  |  |  |  |
|  |  |  |  |  |  |
| **≥ 1 dispensing of the following drugs (ATC code, 1 year before index surgery), n (%)** |  |  |  |  |  |
| A06AG20 - Combinations | 6102    (60.8) | 10628    (59.3) |  | 3422    (60.3) | 3422    (60.3) |
| J01MA01 - Ofloxacin | 5564    (55.4) | 9472    (52.9) |  | 3068    (54.0) | 3155    (55.6) |
| V08CA02 - Gadoteric acid | 5356    (53.3) | 6288    (35.1) |  | 2704    (47.6) | 2719    (47.9) |
| D08AG02 - Povidone-iodine | 4723    (47.0) | 7368    (41.1) |  | 2571    (45.3) | 2580    (45.4) |
| J01MA02 - Ciprofloxacin | 2883    (28.7) | 4144    (23.1) |  | 1523    (26.8) | 1521    (26.8) |
| J07BB02 - Influenza, inactivated, split virus or surface antigen | 2309    (23.0) | 4288    (23.9) |  | 1289    (22.7) | 1317    (23.2) |
| N02BE01 - Paracetamol | 2015    (20.1) | 3964    (22.1) |  | 1164    (20.5) | 1150    (20.3) |
| B01AC06 - Acetylsalicylic acid | 1639    (16.3) | 3030    (16.9) |  | 940    (16.6) | 914    (16.1) |
| H02AB06 - Prednisolone | 1601    (15.9) | 2528    (14.1) |  | 875    (15.4) | 875    (15.4) |
| A02BC01 - Omeprazole | 1547    (15.4) | 2462    (13.7) |  | 836    (14.7) | 793    (14.0) |
| M01AE01 - Ibuprofen | 1529    (15.2) | 2325    (13.0) |  | 803    (14.1) | 809    (14.3) |
| N01BB02 - Lidocaine | 1495    (14.9) | 3181    (17.8) |  | 881    (15.5) | 856    (15.1) |
| M01AE03 - Ketoprofen | 1372    (13.7) | 2182    (12.2) |  | 729    (12.8) | 716    (12.6) |
| V08CA09 - Gadobutrol | 1293    (12.9) | 2459    (13.7) |  | 869    (15.3) | 898    (15.8) |
| A03AX12 - Phloroglucinol | 1137    (11.3) | 1909    (10.7) |  | 630    (11.1) | 654    (11.5) |
| C10AA05 - Atorvastatin | 963      (9.6) | 1854    (10.4) |  | 579    (10.2) | 564      (9.9) |
| H04AA01 - Glucagon | 939      (9.4) | 2314    (12.9) |  | 652    (11.5) | 673    (11.9) |
| V08AB07 - Ioversol | 868      (8.6) | 2212    (12.3) |  | 531      (9.4) | 512      (9.0) |
| A02BC05 - Esomeprazole | 851      (8.5) | 1340      (7.5) |  | 454      (8.0) | 473      (8.3) |
| G04CA01 - Alfuzosin | 800      (8.0) | 1257      (7.0) |  | 410      (7.2) | 422      (7.4) |
| G04CA04 - Silodosin | 787      (7.8) | 1248      (7.0) |  | 404      (7.1) | 416      (7.3) |
| P01AB01 - Metronidazole | 711      (7.1) | 1204      (6.7) |  | 407      (7.2) | 403      (7.1) |
| N05CF02 - Zolpidem | 624      (6.2) | 1068      (6.0) |  | 344      (6.1) | 343      (6.0) |
| N05BA12 - Alprazolam | 622      (6.2) | 1194      (6.7) |  | 358      (6.3) | 343      (6.0) |
| V08AB11 - Iobitridol | 619      (6.2) | 1020      (5.7) |  | 283      (5.0) | 309      (5.4) |
| M04AA01 - Allopurinol | 616      (6.1) | 1219      (6.8) |  | 353      (6.2) | 361      (6.4) |
| N05BB01 - Hydroxyzine | 591      (5.9) | 910      (5.1) |  | 297      (5.2) | 313      (5.5) |
| R05DB - Other cough suppressants | 537      (5.3) | 1101      (6.1) |  | 313      (5.5) | 308      (5.4) |
| J01EE01 - Sulfamethoxazole and trimethoprim | 530      (5.3) | 787      (4.4) |  | 284      (5.0) | 298      (5.2) |
| R01AD09 - Mometasone | 522      (5.2) | 765      (4.3) |  | 296      (5.2) | 289      (5.1) |
| J01MA12 - Levofloxacin | 521      (5.2) | 1338      (7.5) |  | 302      (5.3) | 299      (5.3) |
| V08AB02 - Iohexol | 497      (5.0) | 1131      (6.3) |  | 250      (4.4) | 265      (4.7) |
| S01CA01 - Dexamethasone and antiinfectives | 490      (4.9) | 817      (4.6) |  | 278      (4.9) | 252      (4.4) |
| C10AA01 - Simvastatin | 486      (4.8) | 990      (5.5) |  | 278      (4.9) | 295      (5.2) |
| A11CC05 - Colecalciferol | 478      (4.8) | 784      (4.4) |  | 264      (4.7) | 246      (4.3) |
| V08AB05 - Iopromide | 476      (4.7) | 1042      (5.8) |  | 264      (4.7) | 262      (4.6) |
| C07AB07 - Bisoprolol | 466      (4.6) | 913      (5.1) |  | 271      (4.8) | 256      (4.5) |
| D06AX01 - Fusidic acid | 455      (4.5) | 730      (4.1) |  | 228      (4.0) | 230      (4.1) |
| D02AC - Soft paraffin and fat products | 446      (4.4) | 751      (4.2) |  | 245      (4.3) | 234      (4.1) |
| G04CA02 - Tamsulosin | 434      (4.3) | 849      (4.7) |  | 280      (4.9) | 263      (4.6) |
| J01DD08 - Cefixime | 412      (4.1) | 626      (3.5) |  | 210      (3.7) | 211      (3.7) |
| J01MA06 - Norfloxacin | 411      (4.1) | 953      (5.3) |  | 260      (4.6) | 255      (4.5) |
| A10BA02 - Metformin | 411      (4.1) | 774      (4.3) |  | 251      (4.4) | 238      (4.2) |
| J01MA07 - Lomefloxacin | 410      (4.1) | 1155      (6.4) |  | 299      (5.3) | 278      (4.9) |
| M02AA15 - Diclofenac | 407      (4.1) | 968      (5.4) |  | 238      (4.2) | 259      (4.6) |
| B01AB05 - Enoxaparin | 405      (4.0) | 894      (5.0) |  | 238      (4.2) | 226      (4.0) |
| R06AD08 - Oxomemazine | 405      (4.0) | 806      (4.5) |  | 233      (4.1) | 218      (3.8) |
| D01AC08 - Ketoconazole | 397      (4.0) | 624      (3.5) |  | 216      (3.8) | 210      (3.7) |
| C08CA13 - Lercanidipine | 390      (3.9) | 805      (4.5) |  | 242      (4.3) | 232      (4.1) |
| A03AA05 - Trimebutine | 382      (3.8) | 567      (3.2) |  | 196      (3.5) | 209      (3.7) |
| R06AE09 - Levocetirizine | 378      (3.8) | 524      (2.9) |  | 207      (3.6) | 201      (3.5) |
| C09AA05 - Ramipril | 364      (3.6) | 732      (4.1) |  | 218      (3.8) | 218      (3.8) |
| J01FA10 - Azithromycin | 364      (3.6) | 518      (2.9) |  | 185      (3.3) | 198      (3.5) |
| B01AC04 - Clopidogrel | 359      (3.6) | 728      (4.1) |  | 208      (3.7) | 200      (3.5) |
| R05DA20 - Combinations | 353      (3.5) | 757      (4.2) |  | 232      (4.1) | 222      (3.9) |
| M01AE11 - Tiaprofenic acid | 339      (3.4) | 548      (3.1) |  | 215      (3.8) | 197      (3.5) |
| G04CX02 - Sabalis serrulatae fructus | 330      (3.3) | 641      (3.6) |  | 207      (3.6) | 187      (3.3) |
| J01FA09 - Clarithromycin | 324      (3.2) | 640      (3.6) |  | 184      (3.2) | 195      (3.4) |
| C09CA04 - Irbesartan | 324      (3.2) | 513      (2.9) |  | 184      (3.2) | 179      (3.2) |
| R01AD52 - Prednisolone, combinations | 321      (3.2) | 696      (3.9) |  | 203      (3.6) | 198      (3.5) |
| C07AB12 - Nebivolol | 319      (3.2) | 618      (3.5) |  | 192      (3.4) | 183      (3.2) |
| G04CB02 - Dutasteride | 319      (3.2) | 540      (3.0) |  | 187      (3.3) | 178      (3.1) |
| J07CA02 - Diphtheria-pertussis-poliomyelitis-tetanus | 311      (3.1) | 611      (3.4) |  | 186      (3.3) | 209      (3.7) |
| A06AD15 - Macrogol | 295      (2.9) | 632      (3.5) |  | 161      (2.8) | 161      (2.8) |
| N02AX52 - Tramadol in association | 268      (2.7) | 604      (3.4) |  | 155      (2.7) | 167      (2.9) |
| R01AD12 - Fluticasone furoate | 267      (2.7) | 425      (2.4) |  | 152      (2.7) | 141      (2.5) |
| N06AB10 - Escitalopram | 265      (2.6) | 378      (2.1) |  | 144      (2.5) | 141      (2.5) |
| M01AX26 - Avocado and soyabean oil, unsaponifiables | 258      (2.6) | 402      (2.2) |  | 136      (2.4) | 148      (2.6) |
| R06AX29 - Bilastine | 257      (2.6) | 380      (2.1) |  | 135      (2.4) | 142      (2.5) |
| J01DD04 - Ceftriaxone | 251      (2.5) | 329      (1.8) |  | 122      (2.1) | 117      (2.1) |
| C08CA01 - Amlodipine | 242      (2.4) | 370      (2.1) |  | 117      (2.1) | 127      (2.2) |
| C09CA06 - Candesartan | 238      (2.4) | 503      (2.8) |  | 151      (2.7) | 154      (2.7) |
| A10BB09 - Gliclazide | 228      (2.3) | 474      (2.6) |  | 138      (2.4) | 126      (2.2) |
| A06AB58 - Sodium picosulfate, combinations | 226      (2.3) | 302      (1.7) |  | 112      (2.0) | 123      (2.2) |
| C09DA03 - Valsartan and diuretics | 222      (2.2) | 493      (2.8) |  | 143      (2.5) | 130      (2.3) |
| V08CA04 - Gadoteridol | 218      (2.2) | 280      (1.6) |  | 122      (2.1) | 127      (2.2) |
| S02CA06 - Dexamethasone and antiinfectives | 213      (2.1) | 325      (1.8) |  | 117      (2.1) | 113      (2.0) |
| D07AD01 - Clobetasol | 212      (2.1) | 310      (1.7) |  | 101      (1.8) | 102      (1.8) |
| B01AA - Vitamin k antagonists | 210      (2.1) | 426      (2.4) |  | 114      (2.0) | 121      (2.1) |
| C07AB03 - Atenolol | 204      (2.0) | 437      (2.4) |  | 119      (2.1) | 118      (2.1) |
| R05DA04 - Codeine | 204      (2.0) | 427      (2.4) |  | 125      (2.2) | 120      (2.1) |
| R01AX10 - Various | 201      (2.0) | 515      (2.9) |  | 126      (2.2) | 128      (2.3) |
| J05AB11 - Valaciclovir | 200      (2.0) | 246      (1.4) |  | 85      (1.5) | 90      (1.6) |
| C03CA01 - Furosemide | 193      (1.9) | 364      (2.0) |  | 95      (1.7) | 101      (1.8) |
| D06BB03 - Aciclovir | 189      (1.9) | 270      (1.5) |  | 109      (1.9) | 94      (1.7) |
| A12BA01 - Potassium chloride | 178      (1.8) | 362      (2.0) |  | 109      (1.9) | 98      (1.7) |
| M02AA10 - Ketoprofen | 174      (1.7) | 409      (2.3) |  | 100      (1.8) | 111      (2.0) |
| D08AX07 - Sodium hypochlorite | 168      (1.7) | 473      (2.6) |  | 103      (1.8) | 85      (1.5) |
| V08BA02 - Barium sulfate without suspending agents | 165      (1.6) | 446      (2.5) |  | 92      (1.6) | 93      (1.6) |
| S01FA06 - Tropicamide | 164      (1.6) | 363      (2.0) |  | 100      (1.8) | 95      (1.7) |
| V08AB09 - Iodixanol | 162      (1.6) | 788      (4.4) |  | 111      (2.0) | 108      (1.9) |
| R03BB04 - Tiotropium bromide | 160      (1.6) | 369      (2.1) |  | 99      (1.7) | 90      (1.6) |
| M01AX05 - Glucosamine | 160      (1.6) | 248      (1.4) |  | 86      (1.5) | 86      (1.5) |
| N02AX02 - Tramadol | 151      (1.5) | 321      (1.8) |  | 86      (1.5) | 84      (1.5) |
| S01BC01 - Indometacin | 145      (1.4) | 304      (1.7) |  | 82      (1.4) | 85      (1.5) |
| A02BC03 - Lansoprazole | 132      (1.3) | 275      (1.5) |  | 78      (1.4) | 78      (1.4) |
| C10AA03 - Pravastatin | 127      (1.3) | 282      (1.6) |  | 72      (1.3) | 85      (1.5) |
| M04AA03 - Febuxostat | 113      (1.1) | 279      (1.6) |  | 60      (1.1) | 79      (1.4) |
| C10AB05 - Fenofibrate | 91      (0.9) | 215      (1.2) |  | 57      (1.0) | 43      (0.8) |
| C09AA04 - Perindopril | 90      (0.9) | 208      (1.2) |  | 59      (1.0) | 57      (1.0) |
| N05BA04 - Oxazepam | 81      (0.8) | 197      (1.1) |  | 42      (0.7) | 41      (0.7) |
| M04AC01 - Colchicine | 77      (0.8) | 166      (0.9) |  | 38      (0.7) | 43      (0.8) |
| C09DA04 - Irbesartan and diuretics | 64      (0.6) | 136      (0.8) |  | 36      (0.6) | 43      (0.8) |
| R03AK07 - Formoterol and budesonide | 60      (0.6) | 141      (0.8) |  | 35      (0.6) | 38      (0.7) |
| A03ED - Antispasmodics in combination with other drugs | 34      (0.3) | 95      (0.5) |  | 20      (0.4) | 18      (0.3) |
| N07CA01 - Betahistine | 27      (0.3) | 79      (0.4) |  | 19      (0.3) | 23      (0.4) |
| J01MA04 - Enoxacin | 25      (0.2) | 448      (2.5) |  | 14      (0.2) | 131      (2.3) |
|  |  |  |  |  |  |
|  |  |  |  |  |  |
| **≥ 1 of the following medical procedure (1 year before index surgery), n (%)** |  |  |  |  |  |
| Prostate biopsy via transrectal route with ultrasound guidance | 9021    (89.9) | 16718    (93.3) |  | 5280    (93.0) | 5287    (93.1) |
| Digital archiving of a CT or MRI examination | 7281    (72.5) | 11688    (65.3) |  | 3941    (69.4) | 3899    (68.7) |
| MRI of the abdomen or pelvis with intravenous contrast injection | 7175    (71.5) | 9842    (54.9) |  | 3968    (69.9) | 4039    (71.1) |
| Anatomopathological examination of biopsied tissue from an anatomical structure with mapping | 4987    (49.7) | 10730    (59.9) |  | 2959    (52.1) | 2980    (52.5) |
| Whole-body bone scintigraphy in a single time [late phase] | 4929    (49.1) | 8568    (47.8) |  | 2774    (48.9) | 2787    (49.1) |
| Histopathological diagnosis of malignant tumor lesions | 3939    (39.2) | 9772    (54.6) |  | 2506    (44.1) | 2564    (45.2) |
| General or regional anesthesia | 3660    (36.5) | 7062    (39.4) |  | 2118    (37.3) | 2155    (38.0) |
| Ultrasound guidance | 3586    (35.7) | 7659    (42.8) |  | 2225    (39.2) | 2141    (37.7) |
| Histopathological examination of biopsies from an anatomical structure with mapping | 3395    (33.8) | 4890    (27.3) |  | 1804    (31.8) | 1791    (31.5) |
| Immunohistochemical examination of fixed tissue samples with 1 to 4 antibodies | 3005    (29.9) | 6148    (34.3) |  | 1747    (30.8) | 1785    (31.4) |
| Tomoscintigraphy as a complement to planar imaging | 2077    (20.7) | 3586    (20.0) |  | 1173    (20.7) | 1162    (20.5) |
| Transthoracic Doppler echocardiography of the heart and intrathoracic vessels | 1893    (18.9) | 3750    (20.9) |  | 1080    (19.0) | 1050    (18.5) |
| CT scan of the abdomen and pelvis with intravenous contrast injection | 1809    (18.0) | 4317    (24.1) |  | 953    (16.8) | 937    (16.5) |
| Immunocytochemical or immunohistochemical examination of fixed cellular or tissue samples with 1 to 2 antibodies | 1640    (16.3) | 2387    (13.3) |  | 856    (15.1) | 873    (15.4) |
| Chest X-ray | 1449    (14.4) | 2392    (13.4) |  | 728    (12.8) | 751    (13.2) |
| Unilateral or bilateral transcutaneous ultrasound of the kidney, lumbar region, bladder and prostate | 1426    (14.2) | 2917    (16.3) |  | 825    (14.5) | 851    (15.0) |
| Intravenous contrast injection during radiographic or CT examination | 1147    (11.4) | 3214    (17.9) |  | 674    (11.9) | 667    (11.7) |
| Transcutaneous ultrasound of the bladder and/or prostate | 1191    (11.9) | 1774      (9.9) |  | 649    (11.4) | 657    (11.6) |
| Stress test on treadmill or ergometer with discontinuous electrocardiography | 1146    (11.4) | 1791    (10.0) |  | 618    (10.9) | 624    (11.0) |
| CT scan of three or more anatomical regions with contrast injection | 1139    (11.3) | 2331    (13.0) |  | 655    (11.5) | 651    (11.5) |
| Examination of binocular vision | 997      (9.9) | 1647      (9.2) |  | 567    (10.0) | 557      (9.8) |
| MRI of the abdomen or pelvis without intravenous contrast injection | 994      (9.9) | 1387      (7.7) |  | 545      (9.6) | 542      (9.5) |
| Ultrasound of the bladder and prostate via rectal route | 961      (9.6) | 1830    (10.2) |  | 572    (10.1) | 565    (10.0) |
| Scaling and polishing of teeth on two arches | 961      (9.6) | 1053      (5.9) |  | 458      (8.1) | 471      (8.3) |
| Histopathological diagnosis of tumor lesions | 950      (9.5) | 955      (5.3) |  | 408      (7.2) | 384      (6.8) |
| Fundoscopy using biomicroscopy with contact lens | 920      (9.2) | 1507      (8.4) |  | 508      (8.9) | 502      (8.8) |
| Late planar scintigraphy images without reinjection | 835      (8.3) | 1410      (7.9) |  | 483      (8.5) | 504      (8.9) |
| MRI of the abdomen and pelvis with intravenous contrast injection | 770      (7.7) | 744      (4.2) |  | 380      (6.7) | 342      (6.0) |
| Transcutaneous ultrasound of the abdomen with ultrasound of the pelvis | 627      (6.2) | 1287      (7.2) |  | 346      (6.1) | 360      (6.3) |
| Late tomoscintigraphic images without reinjection | 654      (6.5) | 1544      (8.6) |  | 384      (6.8) | 391      (6.9) |
| Panoramic dentomaxillary radiograph | 631      (6.3) | 766      (4.3) |  | 296      (5.2) | 292      (5.1) |
| CT scan of the thorax with intravenous contrast injection | 619      (6.2) | 1043      (5.8) |  | 304      (5.4) | 329      (5.8) |
| Urethrocystoscopy | 620      (6.2) | 789      (4.4) |  | 286      (5.0) | 296      (5.2) |
| Functional examination of ocular motility | 597      (5.9) | 968      (5.4) |  | 342      (6.0) | 323      (5.7) |
| Radiograph of the pelvic girdle (hip) in one view | 512      (5.1) | 1013      (5.7) |  | 294      (5.2) | 266      (4.7) |
| Ultrasound of muscle and/or tendon | 486      (4.8) | 536      (3.0) |  | 210      (3.7) | 222      (3.9) |
| Whole-body bone scintigraphy performed in multiple stages | 463      (4.6) | 1114      (6.2) |  | 292      (5.1) | 269      (4.7) |
| Intraoral retrocoronal radiograph of 1 to 3 adjacent teeth | 413      (4.1) | 534      (3.0) |  | 216      (3.8) | 220      (3.9) |
| Whole-body positron emission tomography (PET) scan | 407      (4.1) | 487      (2.7) |  | 202      (3.6) | 201      (3.5) |
| Immunocytochemical or immunohistochemical examination of fixed cellular or tissue samples | 394      (3.9) | 575      (3.2) |  | 214      (3.8) | 219      (3.9) |
| 3D reconstruction of images acquired by MRI | 366      (3.6) | 269      (1.5) |  | 164      (2.9) | 136      (2.4) |
| CT scan of the thorax without intravenous contrast injection | 330      (3.3) | 540      (3.0) |  | 170      (3.0) | 174      (3.1) |
| Pure-tone and speech audiometry with tympanometry | 326      (3.2) | 426      (2.4) |  | 158      (2.8) | 159      (2.8) |
| MRI with 6 or more sequences | 312      (3.1) | 164      (0.9) |  | 100      (1.8) | 88      (1.6) |
| Prostate biopsy via transperineal route with ultrasound guidance | 310      (3.1) | 88      (0.5) |  | 53      (0.9) | 44      (0.8) |
| Therapeutic injection of pharmacological agent into a lower limb | 271      (2.7) | 344      (1.9) |  | 132      (2.3) | 130      (2.3) |
| Restoration of a premolar-molar sector tooth on 3 or more surfaces using a plastic-phase material | 271      (2.7) | 297      (1.7) |  | 127      (2.2) | 132      (2.3) |
| Skull and/or facial bone radiograph in 1 or 2 views | 250      (2.5) | 670      (3.7) |  | 161      (2.8) | 175      (3.1) |
| Unilateral or bilateral MRI of a segment of the lower limb without contrast injection | 233      (2.3) | 344      (1.9) |  | 113      (2.0) | 114      (2.0) |
| MRI of one or two segments of the spine and its contents without intravenous contrast injection | 232      (2.3) | 332      (1.9) |  | 120      (2.1) | 115      (2.0) |
| Extraction of a permanent tooth without alveolectomy | 223      (2.2) | 317      (1.8) |  | 123      (2.2) | 131      (2.3) |
| Restoration of a premolar-molar sector tooth on 2 surfaces using a plastic-phase material | 223      (2.2) | 252      (1.4) |  | 115      (2.0) | 115      (2.0) |
| Transcutaneous ultrasound of the thyroid gland | 214      (2.1) | 303      (1.7) |  | 104      (1.8) | 101      (1.8) |
| Unilateral or bilateral transcutaneous Doppler ultrasound of the kidney and its vessels | 195      (1.9) | 216      (1.2) |  | 79      (1.4) | 83      (1.5) |
| Nocturnal respiratory polygraphy | 181      (1.8) | 253      (1.4) |  | 90      (1.6) | 92      (1.6) |
| Placement of a ceramic-metallic dental crown or equivalent mineral crown | 179      (1.8) | 172      (1.0) |  | 76      (1.3) | 81      (1.4) |
| Placement of a cast metal core buildup on a tooth | 146      (1.5) | 153      (0.9) |  | 68      (1.2) | 65      (1.1) |
| Fibroscopy of the pharynx and larynx via nasal route | 138      (1.4) | 187      (1.0) |  | 59      (1.0) | 67      (1.2) |
| Immunocytochemical or immunohistochemical examination of fixed cellular or tissue samples with 6 to 9 antibodies | 130      (1.3) | 113      (0.6) |  | 55      (1.0) | 52      (0.9) |
| Immunohistochemical examination of fixed tissue samples with 5 or more antibodies | 147      (1.5) | 446      (2.5) |  | 75      (1.3) | 74      (1.3) |
| Intraoral retroalveolar radiographs for 1 to 3 adjacent teeth | 144      (1.4) | 173      (1.0) |  | 75      (1.3) | 68      (1.2) |
| Histopathological examination of staged biopsies from an anatomical structure | 133      (1.3) | 188      (1.0) |  | 81      (1.4) | 78      (1.4) |
| Restoration of an incisor-canine sector tooth on 3 or more surfaces using a plastic-phase material | 126      (1.3) | 124      (0.7) |  | 53      (0.9) | 62      (1.1) |
| 3D reconstruction of images acquired by CT scan | 117      (1.2) | 123      (0.7) |  | 52      (0.9) | 44      (0.8) |
| Unilateral or bilateral ultrasound of a joint | 117      (1.2) | 127      (0.7) |  | 50      (0.9) | 43      (0.8) |
| Continuous transthoracic echocardiography with stress test on an ergometer bed | 117      (1.2) | 96      (0.5) |  | 49      (0.9) | 40      (0.7) |
| Transcutaneous ultrasound of the upper abdomen | 113      (1.1) | 241      (1.3) |  | 70      (1.2) | 65      (1.1) |
| Restoration of an incisor-canine sector tooth on 2 surfaces using a plastic-phase material without root anchoring | 98      (1.0) | 133      (0.7) |  | 48      (0.8) | 47      (0.8) |
| Anatomopathological examination of an excised anatomical structure | 97      (1.0) | 208      (1.2) |  | 61      (1.1) | 58      (1.0) |
| Restoration of a tooth using a plastic-phase material with root anchoring | 95      (0.9) | 122      (0.7) |  | 51      (0.9) | 47      (0.8) |
| Skull and/or facial bone radiographs in 3 or more views | 94      (0.9) | 124      (0.7) |  | 48      (0.8) | 44      (0.8) |
| Restoration of a premolar-molar sector tooth on 1 surface using a plastic-phase material | 93      (0.9) | 129      (0.7) |  | 47      (0.8) | 46      (0.8) |
| Intraoral retroalveolar radiographs for 1 to 3 adjacent teeth preoperative | 92      (0.9) | 94      (0.5) |  | 38      (0.7) | 41      (0.7) |
| Therapeutic injection of pharmacological agent into an upper limb | 89      (0.9) | 134      (0.7) |  | 51      (0.9) | 50      (0.9) |
| Anatomopathological examination of fragments from an endoscopic resection of the prostate | 86      (0.9) | 258      (1.4) |  | 53      (0.9) | 52      (0.9) |
| Whole-body bone scintigraphy segment by segment in a single phase [late phase] | 86      (0.9) | 89      (0.5) |  | 36      (0.6) | 43      (0.8) |
| Excision of the living pulp of a permanent molar | 82      (0.8) | 85      (0.5) |  | 35      (0.6) | 39      (0.7) |
| Restoration of an incisor-canine sector tooth on 1 angle using a plastic-phase material | 77      (0.8) | 100      (0.6) |  | 42      (0.7) | 41      (0.7) |
| Simultaneous diagnostic and therapeutic management of traumatic osteoarticular, musculotendinous, or soft tissue lesions | 75      (0.7) | 96      (0.5) |  | 31      (0.5) | 31      (0.5) |
| Prostate biopsy via transrectal route with finger guidance | 73      (0.7) | 658      (3.7) |  | 47      (0.8) | 51      (0.9) |
| Restoration of an incisor-canine sector tooth on 1 surface using a plastic-phase material | 73      (0.7) | 102      (0.6) |  | 41      (0.7) | 47      (0.8) |
| Transcutaneous ultrasound of the abdomen with Doppler ultrasound of digestive vessels | 72      (0.7) | 76      (0.4) |  | 27      (0.5) | 25      (0.4) |
| Placement of a metallic dental crown | 71      (0.7) | 100      (0.6) |  | 41      (0.7) | 35      (0.6) |
| Complex quantification of a scintigraphy study | 70      (0.7) | 158      (0.9) |  | 44      (0.8) | 53      (0.9) |
| Unilateral or bilateral CT scan of a segment of the upper limb without contrast injection | 70      (0.7) | 74      (0.4) |  | 35      (0.6) | 31      (0.5) |
| Manual medicine session for the spine | 69      (0.7) | 89      (0.5) |  | 34      (0.6) | 30      (0.5) |
| Anatomopathological examination of excised specimens, monobloc or in undifferentiated fragments | 67      (0.7) | 89      (0.5) |  | 31      (0.5) | 32      (0.6) |
| Unilateral or bilateral Doppler ultrasound of the vessels of the scrotum and spermatic cord | 65      (0.6) | 77      (0.4) |  | 30      (0.5) | 28      (0.5) |
| Coronary angiography without left ventriculography via percutaneous arterial access | 64      (0.6) | 88      (0.5) |  | 31      (0.5) | 32      (0.6) |
| Urethrocystoscopy with a rigid endoscope | 63      (0.6) | 218      (1.2) |  | 41      (0.7) | 37      (0.7) |
| Anatomopathological examination of staged biopsies from an anatomical structure | 56      (0.6) | 216      (1.2) |  | 36      (0.6) | 40      (0.7) |
| Whole-body bone scintigraphy segment by segment in multiple phases | 55      (0.5) | 135      (0.8) |  | 33      (0.6) | 47      (0.8) |
| Ultrasound of the bladder and prostate via urethral route | 54      (0.5) | 143      (0.8) |  | 26      (0.5) | 37      (0.7) |
| Extracapsular extraction of the lens by phacoemulsification with implantation of an artificial lens | 41      (0.4) | 86      (0.5) |  | 24      (0.4) | 25      (0.4) |
| Resection of prostate hypertrophy via urethrocystoscopy | 39      (0.4) | 155      (0.9) |  | 22      (0.4) | 23      (0.4) |
| CT scan of three or more anatomical regions without contrast injection | 37      (0.4) | 151      (0.8) |  | 19      (0.3) | 17      (0.3) |
| Urethral profilometry | 10      (0.1) | 410      (2.3) |  | 6      (0.1) | 99      (1.7) |
| Continuous monitoring of electrocardiogram via oscilloscope and/or telemetry | 23      (0.2) | 57      (0.3) |  | 11      (0.2) | 13      (0.2) |
| Uroflowmetry | 17      (0.2) | 126      (0.7) |  | 8      (0.1) | 62      (1.1) |
| Cystomanometry via urethral catheterization with urethral profilometry | 7      (0.1) | 295      (1.6) |  | 3      (0.1) | 67      (1.2) |
|  |  |  |  |  |  |
|  |  |  |  |  |  |
| **≥ 1 of the following medical device (1 year before index surgery), n (%)** |  |  |  |  |  |
| Eyeglass frame | 2420    (24.1) | 4064    (22.7) |  | 1366    (24.1) | 1348    (23.7) |
| Cutaneous perineal probe or electrode | 2105    (21.0) | 3610    (20.2) |  | 1189    (20.9) | 1217    (21.4) |
| Single-vision white lens | 523      (5.2) | 751      (4.2) |  | 275      (4.8) | 279      (4.9) |
| Double-vision white lens | 377      (3.8) | 618      (3.5) |  | 215      (3.8) | 233      (4.1) |
| Self-monitoring of blood sugar, 100 test strips, sensors, or electrodes | 360      (3.6) | 682      (3.8) |  | 204      (3.6) | 223      (3.9) |
| Continuous positive airway pressure for sleep apnea treatment | 327      (3.3) | 490      (2.7) |  | 175      (3.1) | 170      (3.0) |
| Self-monitoring, 200 sterile, non-reusable lancets for lancing device | 244      (2.4) | 484      (2.7) |  | 144      (2.5) | 152      (2.7) |
| Hearing aid | 230      (2.3) | 450      (2.5) |  | 129      (2.3) | 146      (2.6) |
| Sterile hydrophilic gauze compresses | 226      (2.3) | 445      (2.5) |  | 124      (2.2) | 118      (2.1) |
| Hydrocellular dressings | 206      (2.1) | 198      (1.1) |  | 74      (1.3) | 91      (1.6) |
| Incontinence, 10 leg or night bags | 121      (1.2) | 77      (0.4) |  | 43      (0.8) | 43      (0.8) |
| Uro-genital, neuromuscular electrostimulator | 116      (1.2) | 16      (0.1) |  | 63      (1.1) | 6      (0.1) |
| Sterile non-woven compresses | 111      (1.1) | 131      (0.7) |  | 48      (0.8) | 48      (0.8) |
| Collector for urine and fecal matter | 110      (1.1) | 87      (0.5) |  | 42      (0.7) | 43      (0.8) |
| Sterile adhesive dressing with absorbent compress | 106      (1.1) | 129      (0.7) |  | 45      (0.8) | 49      (0.9) |
| Set for post-operative wound, sutured and non-infected | 96      (1.0) | 103      (0.6) |  | 41      (0.7) | 53      (0.9) |
| Incontinence, 30 leg or night bags | 94      (0.9) | 99      (0.6) |  | 42      (0.7) | 47      (0.8) |
| Sterile adhesive dressing with absorbent compress | 57      (0.6) | 74      (0.4) |  | 23      (0.4) | 29      (0.5) |
| Infusion, single-use accessories for infusion setup | 69      (0.7) | 58      (0.3) |  | 31      (0.5) | 25      (0.4) |
| Non-elastic adhesive tape | 61      (0.6) | 141      (0.8) |  | 34      (0.6) | 36      (0.6) |
| Sterile non-woven compresses | 59      (0.6) | 53      (0.3) |  | 24      (0.4) | 21      (0.4) |
| Transcutaneous electrical nerve stimulation, flexible electrodes | 51      (0.5) | 181      (1.0) |  | 42      (0.7) | 30      (0.5) |
| Oral nutrition, adult, hyperprotein-hyperenergy poly blend | 48      (0.5) | 74      (0.4) |  | 21      (0.4) | 31      (0.5) |
| Non-sterile hydrophilic cotton | 32      (0.3) | 72      (0.4) |  | 22      (0.4) | 30      (0.5) |
| Hearing aid, repairs, earpiece | 26      (0.3) | 28      (0.2) |  | 10      (0.2) | 9      (0.2) |
| Cream with hyaluronic acid and silver sulfadiazine | 24      (0.2) | 24      (0.1) |  | 11      (0.2) | 13      (0.2) |
| Calcium alginate, tampon | 22      (0.2) | 57      (0.3) |  | 17      (0.3) | 14      (0.2) |
| Sterile semi-permeable adhesive films | 23      (0.2) | 23      (0.1) |  | 9      (0.2) | 10      (0.2) |
| Hydrocellular dressings | 21      (0.2) | 52      (0.3) |  | 12      (0.2) | 12      (0.2) |
| VHP (vacuum-assisted healing pump), delivery package | 14      (0.1) | 8      (0.0) |  | 5      (0.1) | 1      (0.0) |
| Self-monitoring of blood sugar | 13      (0.1) | 14      (0.1) |  | 7      (0.1) | 5      (0.1) |
| Hyaluronate sodium solution | 13      (0.1) | 7      (0.0) |  | 4      (0.1) | 3      (0.1) |
| Viscoelastic solution, hyaluronic acid | 11      (0.1) | 14      (0.1) |  | 3      (0.1) | 4      (0.1) |
| Stretchable penile sheaths with adaptable tip | 11      (0.1) | 10      (0.1) |  | 4      (0.1) | 7      (0.1) |
| Sterile dressing/compress, absorbent | 9      (0.1) | 32      (0.2) |  | 4      (0.1) | 3      (0.1) |
| Pure calcium alginate dressing | 9      (0.1) | 7      (0.0) |  | 3      (0.1) | 4      (0.1) |
| Hyaluronate sodium solution | 9      (0.1) | 6      (0.0) |  | 2      (0.0) | 1      (0.0) |
| Oral nutrition, adult, polycarbohydrate-protein blend | 9      (0.1) | 6      (0.0) |  | 2      (0.0) | 5      (0.1) |
| Hyaluronate sodium solution 0.18% | 6      (0.1) | 5      (0.0) |  | 5      (0.1) | 1      (0.0) |
| Medical bed, standard bed | 5      (0.0) | 15      (0.1) |  | 3      (0.1) | 3      (0.1) |
| Silver dressing | 5      (0.0) | 30      (0.2) |  | 1      (0.0) | 4      (0.1) |
| Sterile dressing/compress, absorbent | 4      (0.0) | 22      (0.1) |  | 2      (0.0) | 6      (0.1) |
| Inhalation chamber, respiratory | 4      (0.0) | 12      (0.1) |  | 1      (0.0) | 3      (0.1) |
| VHP (vacuum-assisted healing pump) | 4      (0.0) | 3      (0.0) |  | 2      (0.0) | 1      (0.0) |
| Sterile device for blood collection | 3      (0.0) | 19      (0.1) |  | 1      (0.0) | 1      (0.0) |
|  |  |  |  |  |  |

## Supplementary Table 2.

## Baseline characteristics according to the level of activity of the hospital centre

|  | **Hospital activity**  **50 procedures/year** | **ASD** | **Hospital activity**  **50 - 100 procedures/year** | **ASD** | **Hospital activity**  **≥100 procedures/year** | **ASD** |
| --- | --- | --- | --- | --- | --- | --- |

|  | **RARP n = 1,383** | **ORP n = 11,756** | **IPTW Weighted** | **RARP n = 3,749** | **ORP n = 4,480** | **IPTW Weighted** | **RARP n = 4,908** | **ORP n = 1,675** | **IPTW Weighted** |
| --- | --- | --- | --- | --- | --- | --- | --- | --- | --- |
| **Age at index date (median; years)** | 65.0 | 65.0 | 0.2 | 65.0 | 65.0 | 0.6 | 65.0 | 64.0 | 2.5 |
|  |  |  |  |  |  |  |  |  |  |
| **SDI** |  |  |  |  |  |  |  |  |  |
| Quintile n°1 | 265 (19.2%) | 1444 (12.3%) | 0.4 | 963 (25.7%) | 629 (14.0%) | 1.0 | 1755 (35.8%) | 453 (27.0%) | 2.9 |
| Quintile n°2 | 240 (17.4%) | 2174 (18.5%) | 0.4 | 921 (24.6%) | 862 (19.2%) | 0.6 | 1069 (21.8%) | 375 (22.4%) | 0.3 |
| Quintile n°3 | 353 (25.5%) | 2323 (19.8%) | 0.3 | 728 (19.4%) | 1069 (23.9%) | 0.5 | 765 (15.6%) | 328 (19.6%) | 1.8 |
| Quintile n°4 | 280 (20.2%) | 2469 (21.0%) | 0.1 | 552 (14.7%) | 984 (22.0%) | 0.6 | 689 (14.0%) | 252 (15.0%) | 0.1 |
| Quintile n°5 + NR | 245 (17.7%) | 3346 (28.5%) | 0.5 | 585 (15.6%) | 936 (20.9%) | 0.3 | 630 (12.8%) | 267 (15.9%) | 2.3 |
|  |  |  |  |  |  |  |  |  |  |
| **CCI (median score)** | 2.0 | 2.0 | 6.2 | 2.0 | 2.0 | 0.4 | 2.0 | 2.0 | 2.7 |
|  |  |  |  |  |  |  |  |  |  |
| **Incontinence prior to index date** | 357 (25.8%) | 3381 (28.8%) | 0.8 | 1242 (33.1%) | 841 (18.8%) | 3.1 | 1127 (23.0%) | 349 (20.8%) | 8.4 |
|  |  |  |  |  |  |  |  |  |  |
| **Erectile dysfunction prior to index date** | 12 (0.9%) | 97 (0.8%) | 6.1 | 37 (1.0%) | 225 (0.5%) | 0.2 | 45 (0.9%) | <10 | 9.3 |
|  |  |  |  |  |  |  |  |  |  |
| **Total hospital cost in year before index date (mean ± SD; €)** | 1964 ± 8624 | 1271 ± 3057 | 0.6 | 1310 ± 2945 | 1290 ± 3434 | 0.0 | 1502 ± 5614 | 1224 ± 3979 | 2.5 |
|  |  |  |  |  |  |  |  |  |  |
| **Total hospital cost in month before index date (mean ± SD; €)** | 179 ± 1314 | 99 ± 412 | 0.7 | 110 ± 423 | 81 ± 388 | 1.2 | 142 ± 434 | 109 ± 558 | 0.6 |
|  |  |  |  |  |  |  |  |  |  |
| **Type of hospital (index stay)** |  |  |  |  |  |  |  |  |  |
| Private clinic | 481 (34.8%) | 9110 (77.5%) | 60.0 | 2051 (54.7%) | 3640 (81.3%) | 21.5 | 2937 (59.8%) | 1152 (68.8%) | 0.9 |
| University hospital | 902 (65.2%) | 576 (4.9%) | 127.4 | 1177 (31.4%) | 429 (9.6%) | 15.8 | 1971 (40.2%) | 523 (31.2%) | 0.9 |
| General hospital | 0 (0.0%) | 1,951 (16.6%) | - | 194 (5.2%) | 153 (3.4%) | 9.7 | 0 (0.0%) | 0 (0.0%) | - |
| Other | 0 (0.0%) | 119 (1.0%) | - | 327 (8.7%) | 258 (5.8%) | 4.4 | 0 (0.0%) | 0 (0.0%) | - |
|  |  |  |  |  |  |  |  |  |  |

ASD: absolute standardised difference; CCI: Charlson comorbidity index; IPTW: Inverse Probability of Treatment Weighting; NR: not reported; ORP: open radical prostatectomy; RARP:robot-assisted radical prostatectomy; SD: standard deviation; SDI: social deprivation index.

## Supplementary Table 3

## Hormone therapy and radiotherapy during follow-up

|  | **Matched population** | | **ASD** | **Overall population** | | **ASD** |
| --- | --- | --- | --- | --- | --- | --- |
|  | **RARP n = 5,677** | **ORP n = 5,677** | **Matched** | **RARP n = 10,040** | **PTRP n = 17,911** | **IPTW Weighted** |
|  |  |  |  |  |  |  |
| **HT during follow-up** | **934 (16.5%)** | **985 (17.4%)** | **2.4** | **1,620 (16.1%)** | **3,080 (17.2%)** | **0.3** |
|  |  |  |  |  |  |  |
| Leuproreline | 440 (7.8%) | 473 (8.3%) | 2.1 | 810 (8.1%) | 1,565 (8.7%) | 0.6 |
| Triptoreline | 457 (8.1%) | 439 (7.7%) | 1.2 | 755 (7.5%) | 1,253 (7.0%) | 2.3 |
| Gosereline | 91 (1.6%) | 90 (1.6%) | 0.1 | 146 (1.5%) | 276 (1.5%) | 1.0 |
| Busereline | 0 (0.0%) | 0 (0.0%) |  | 0 (0.0%) | 0 (0.0%) |  |
| Dégarelix | 104 (1.8%) | 92 (1.6%) | 1.0 | 164 (1.6%) | 289 (1.6%) | 4.0 |
| Bicalutamide | 506 (8.9%) | 545 (9.6%) | 2.4 | 858 (8.5%) | 1,880 (10.5%) | 2.3 |
| Nilutamide | ≤10 | ≤10 |  | ≤10 | 26 (0.1%) |  |
| Flutamide | 0 (0.0%) | 0 (0.0%) |  | 0 (0.0%) | ≤10 |  |
| Cyproterone | 79 (1.4%) | 99 (1.7%) | 1.6 | 149 (1.5%) | 335 (1.9%) | 0.6 |
| Diethylstilbestrol | 0 (0.0%) | ≤10 |  | ≤10 | ≤10 |  |
|  |  |  |  |  |  |  |
| Abiraterone acetate | 87 (1.5%) | 72 (1.3%) | 1.2 | 150 (1.5%) | 253 (1.4%) | 0.3 |
| Enzalutamide | 52 (0.9%) | 37 (0.7%) | 1.2 | 84 (0.8%) | 159 (0.9%) | 0.2 |
|  |  |  |  |  |  |  |
| HT startingin the 1st 6 months of follow-up | 351 (6.2%) | 371 (6.5%) | 1.4 | 587 (5.8%) | 1,125 (6.3%) | 0.5 |
|  |  |  |  |  |  |  |
| HT startingafter the 1st 6 months of follow-up | 750 (13.2%) | 807 (14.2%) | 2.9 | 1,267 (12.6%) | 2,413 (13.5%) | 0.4 |
|  |  |  |  |  |  |  |
| **RT during follow-up** | **1,213 (24.7%)** | **1,057 (21.5%)** | **7.5** | **2,433 (24.2%)** | **4,794 (26.8%)** | **0.6** |
|  |  |  |  |  |  |  |
| RT startingin the 1st 6 months of follow-up | 341 (6.9%) | 274 (5.6%) | 5.6 | 659 (6.6%) | 1,355 (7.6%) | 4.3 |
|  |  |  |  |  |  |  |
| RT startingafter the 1st 6 months of follow-up | 1,010 (20.5%) | 955 (19.4%) | 2.8 | 2,021 (20.1%) | 4,050 (22.6%) | 2.7 |
|  |  |  |  |  |  |  |

ASD: absolute standardised difference; IPTW: Inverse Probability of Treatment Weighting; ORP: open radical prostatectomy; RARP: robot-assisted radical prostatectomy.

HT: hormone therapy (all deliveries following each other with no delivery gap longer than 60 days were considered to be part of the same course of treatment)

RT: radiotherapy (all sessions following each other with no gap between sessions longer than 21 days were considered to be part of the same course of treatment

## Supplementary Table 4.

## Hospitalisations and cares for urinary incontinence or erectile dysfuction according to the level of activity of the hospital centre

|  | **Hospital activity**  **50 procedures/year** | | **ASD** | **Hospital activity**  **50 - 100 procedures/year** | | **ASD** | **Hospital activity**  **≥100 procedures/year** | | **ASD** |
| --- | --- | --- | --- | --- | --- | --- | --- | --- | --- |
|  | **RARP n = 1,383** | **ORP n = 11,756** | **IPTW Weighted** | **RARP n = 3,749** | **ORP n = 4,480** | **IPTW Weighted** | **RARP n = 4,908** | **ORP n = 1,675** | **IPTW Weighted** |
| **Median length of index hospital stay (days)** | 7.0 | 9.0 | 58.6 | 6.0 | 9.0 | 93.3 | 5.0 | 9.0 | 128.8 |
| **[IQR]** | [6.0;9.0] | [8.0;11.0] |  | [5.0;7.0] | [7.0;10.0] |  | [5.0;6.0] | [8.0;10.0] |  |
|  |  |  |  |  |  |  |  |  |  |
| **Rehospitalisation in urology within 90 days of index date** | 43 (3.1%) | 295 (2.5%) | 2.0 | 90 (2.4%) | 88 (2.0%) | 0.8 | 156 (3.2%) | 22 (1.3%) | 10.6 |
|  |  |  |  |  |  |  |  |  |  |
| **Incontinence requiring treatment during follow-up** | 484 (35.0%) | 4,615 (39.3%) | 13.6 | 1,181 (31.5%) | 1,869 (41.7%) | 23.8 | 1,327 (27.0%) | 265 (15.8%) | 8.1 |
|  |  |  |  |  |  |  |  |  |  |
| **Erectile disorder requiring treatment during follow-up** | 861 (62.3%) | 6,230 (53.0%) | 8.7 | 1,908 (50.9%) | 2,342 (52.3%) | 8.1 | 2,534 (51.6%) | 807 (48.2%) | 19.3 |
|  |  |  |  |  |  |  |  |  |  |

ASD: absolute standardised difference; IPTW: Inverse Probability of Treatment Weighting; ORP: open radical prostatectomy; RARP: robot-assisted radical prostatectomy.

## Supplementary Figure 1.

## Overall (a) and matched (b) cohorts hdPS distribution

1. Overall cohorts distribution

1. Matched cohorts distribution
